# Supplementary material for: Integrative analysis of lung development–cancer expression associations reveals the roles of signatures with inverse expression patterns
Source: Royal Society of Chemistry journal article supplement (doi:10.1039/c5mb00061k), 2015-02-17
Supplement: c5mb00061k1.pdf [file c5mb00061k1.pdf]

## Supporting Information Legends

**Figure S1. The expression patterns identified from seven lung cancer datasets. (A)** GSE4573. **(B)** GSE37745-SCC. **(C)** TCGA. **(D)** GSE32863. **(E)** GSE26939. **(F)** GSE11969. **(G)** GSE37745-AD. For each cancer dataset, we identified several distinct expression patterns across tumor progression stages. Among these results, up- and down-regulated patterns (color labeled) were defined and further analyzed in our study.

(TIF)

**Figure S2. The distribution of overall slopes in cancer progression patterns. (A)** The frequency of the absolute values of all overall slopes. **(B)** The count of up- and down-regulated patterns when threshold  $s$  equal to 0.05, 0.1 and 0.15.

(TIF)

**Figure S3. The function associations between lung development and lung cancer progression patterns. (A)** We identified significant GO terms enriched by genes with certain expression pattern in development and cancer, and further compared the function associations using hypergeometric test. The cell color showed the P-value performance after hypergeometric test. **(B)** The representative GO terms which were involved in more than two dataset pairs were shown.

(TIF)

**Figure S4. Gene interaction networks in (A)** devD-canU association. **(B)** devU-canD association. Colors denoted different lung cancer datasets and bias lines denoted macaque development. Known lung cancer genes and drug targets were labeled using underline and yellow background.

(TIF)

**Figure S5. The interaction relationship between our risk signature and other previously published signatures.** Using protein-protein interaction network from

HPRD (<http://www.hprd.org/>), we viewed the interaction relationship among all these lung cancer survival signatures. We identified direct protein-protein interactions (blue edges), and indirect interactions via at most one shared protein (green edges). In total, 119 interactions linked the 10 genes of 13-gene risk signature (pink nodes) to genes of other 9 studies. To simplify the graph, remaining edges among other signatures were faded.

(TIF)

**Figure S6. The development-cancer pattern associations when slope cutoff equal to (A) (C) 0.1. (B) (D) 0.15.**

(TIF)

**Table S1. The detailed information of genes with inverse expression patterns in two development-cancer associations.**

(XLS)

**Table S2. Significant sub-pathway results from KEGG enriched in the two development-cancer associations.**

(XLS)

**Table S3. The associations between the development-cancer enriched pathways and lung cancer genes (or drug target genes).**

(XLS)

**Table S4. The detailed information of survival genes in Cell Cycle sub-pathway.**

(XLS)

**Table S5. The detailed information of the 13-gene risk signature.**

(XLS)
