# Supplementary material for: Integrative analysis of lung development–cancer expression associations reveals the roles of signatures with inverse expression patterns
Source: Royal Society of Chemistry journal article supplement (doi:10.1039/c5mb00061k), 2015-02-17

**A**

**Gene interaction network in devD-canU association**

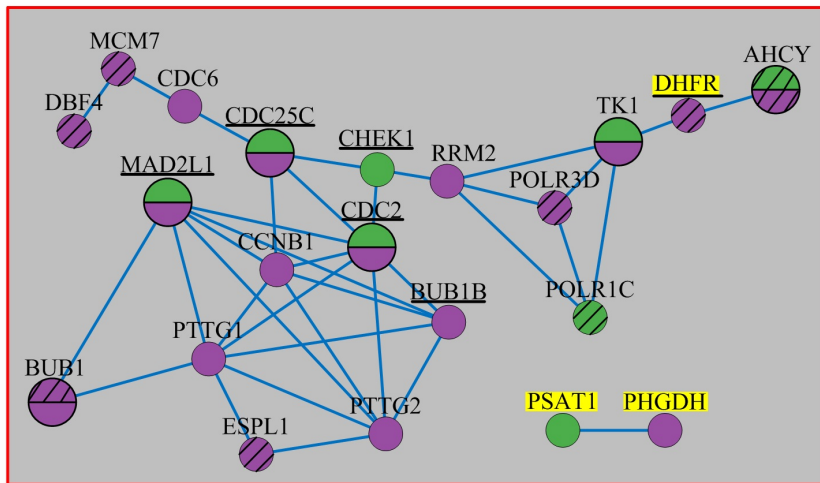

Node color

- GSE32863
- TCGA
- GSE26939
- GSE37745-AD
- GSE37745-SCC

Node type

- Human
- ⊗ Macaque

Node size

- 1
- ⊖ 2
- ⊕ 4

**Drug target**

Lung cancer gene

**B**

**Gene interaction network in devU-canD association**

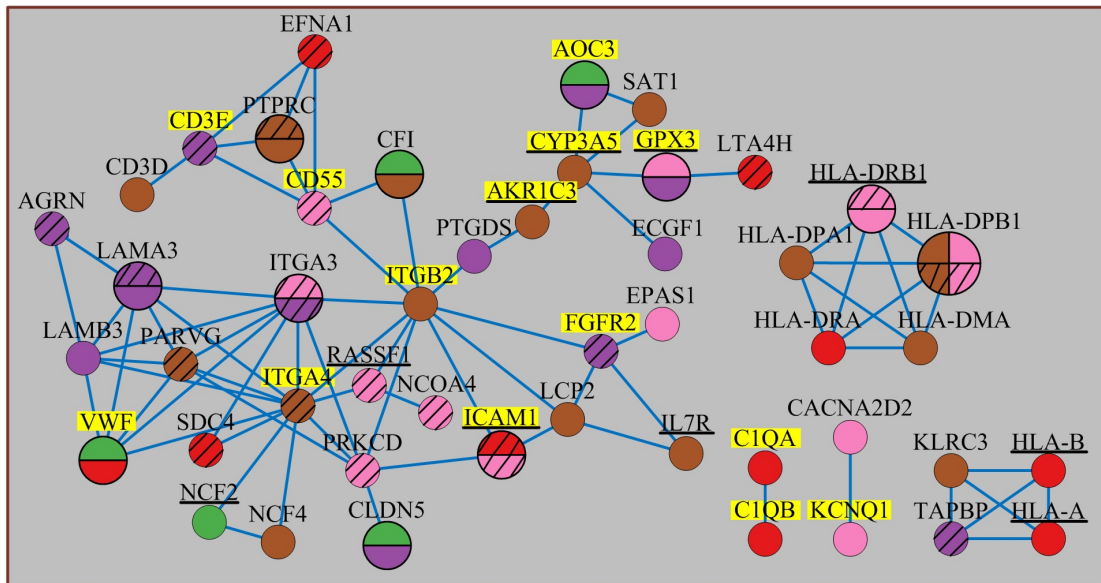

Supplement: c5mb00061k5.pdf [file c5mb00061k5.pdf]
