# Supplementary material for: Integrative analysis of lung development–cancer expression associations reveals the roles of signatures with inverse expression patterns
Source: Royal Society of Chemistry journal article supplement (doi:10.1039/c5mb00061k), 2015-02-17
Supplement: c5mb00061k7.pdf [file c5mb00061k7.pdf]

**A Slope cutoff 0.10**

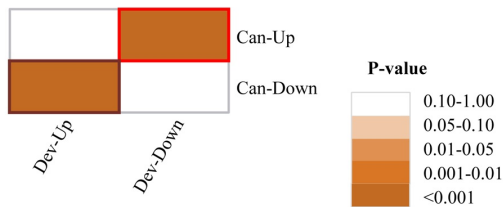

**B Slope cutoff 0.15**

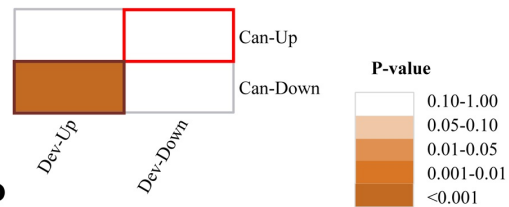

**C**

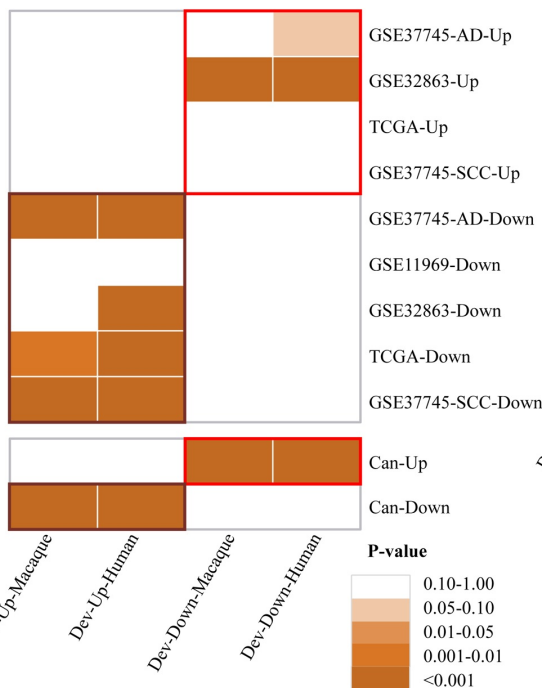

**D**

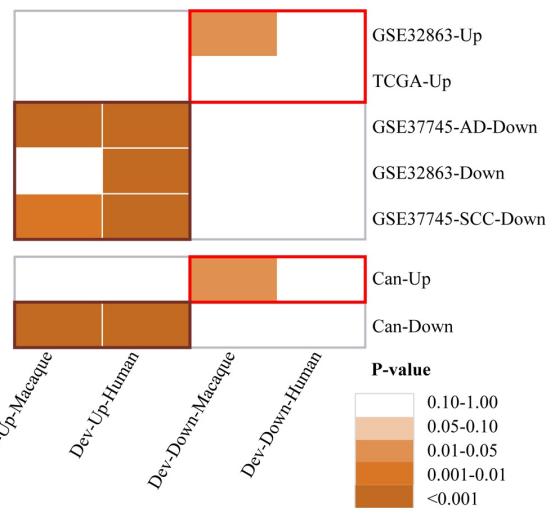

**Two inverse development-cancer associations**

- devD-canU association
- devU-canD association
