# Supplementary figures and images for: Integrative analysis of lung development–cancer expression associations reveals the roles of signatures with inverse expression patterns
Source: Royal Society of Chemistry journal article supplement (doi:10.1039/c5mb00061k), 2015-02-17

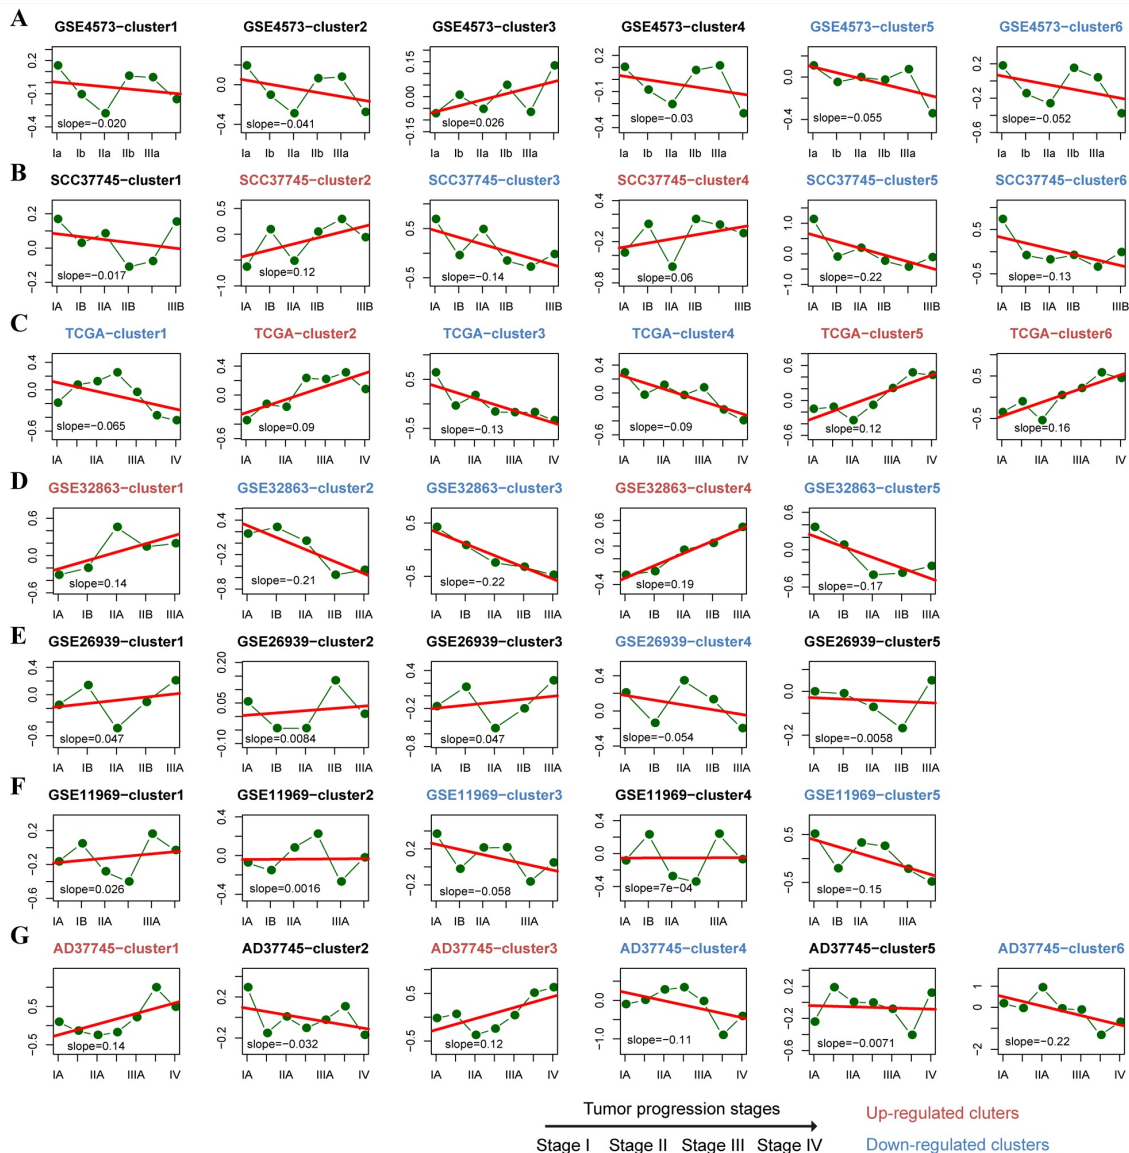

Supplement: c5mb00061k2.pdf [file c5mb00061k2.pdf]

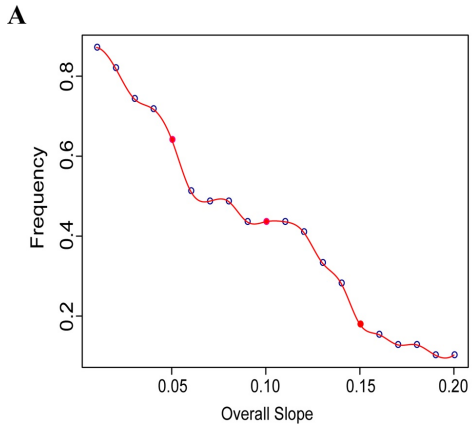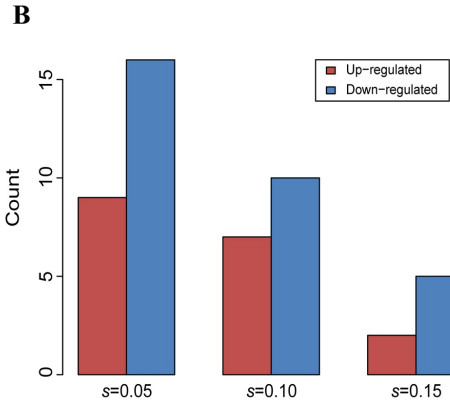

Supplement: c5mb00061k3.pdf [file c5mb00061k3.pdf]

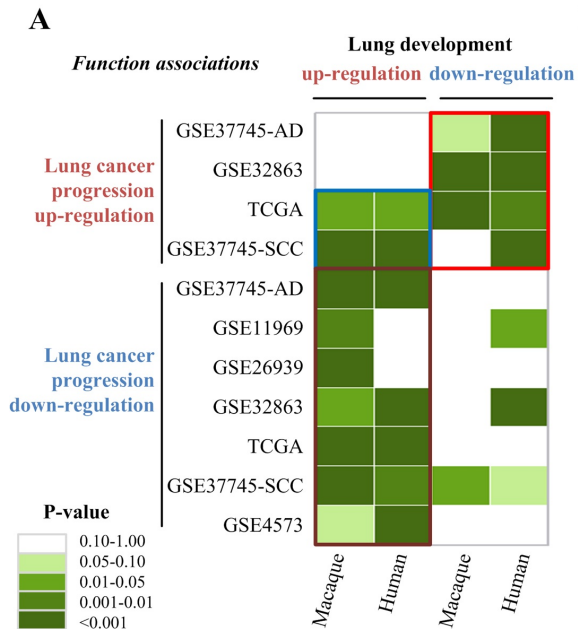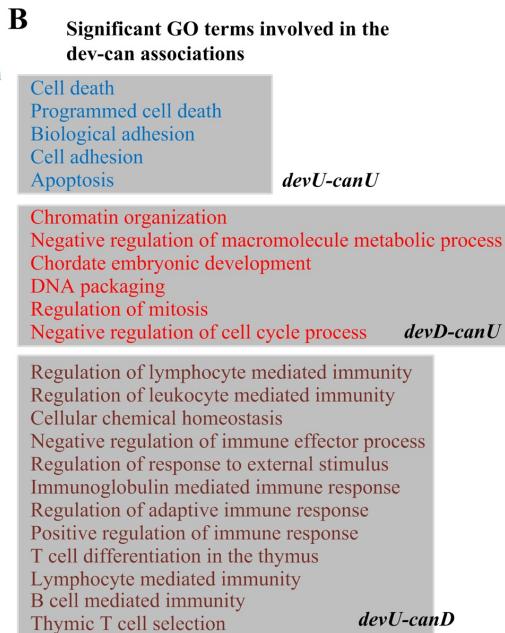

Supplement: c5mb00061k4.pdf [file c5mb00061k4.pdf]
